# Supplementary material
Source: publisher figshare collection journal article supplement (https://sage.figshare.com/ndownloader/files/14464466)
Supplement: Supplementary file 1 [file 14464466]

**Declawing Position Statements**

American Association of Feline Practitioners. [Declawing Position Statement](https://www.catvets.com/guidelines/position-statements/declawing).

American Animal Hospital Association. [Declawing](https://www.aaha.org/professional/resources/declawing.aspx).

American Veterinary Medical Association. [Declawing of Domestic Cats](https://www.avma.org/KB/Policies/Pages/Declawing-of-Domestic-Cats.aspx).

Canadian Veterinary Medical Association (CVMA). [Partial Digital Amputation (Onychectomy or Declawing) of the Domestic Felid - Position Statement](https://www.canadianveterinarians.net/documents/partial-digital-amputation-onychectomy-or-declawing-of-the-domestic-felid-position-statement).

Humane Society Veterinary Medical Association. [Policy Statement on Cosmetic and Convenience Procedures in Companion Animals](http://www.hsvma.org/policy_statements#cosmeticsurgeries).

The Humane Society of the United States. [Declawing cats: Far worse than a manicure](http://www.humanesociety.org/animals/cats/tips/declawing.html).

Best Friends Animal Society. [Cat Declawing](https://bestfriends.org/about-best-friends/policies-and-position-statements#declawing).

International Cat Care and International Society of Feline Medicine. [Position statement on declawing of cats.](https://icatcare.org/declawing-cats)
